# Supplementary material for: Chemical Investigation on the Volatile Part of the CO2 Supercritical Fluid Extract of Infected Aquilaria sinensis (Chinese Agarwood)
Source: MDPI journal article supplement (doi:10.3390/molecules29102297), 2024-05-14
Supplement: s1 [file s1]

Supplementary material

for

## Chemical investigation on the volatile part of the CO<sub>2</sub> super-critical fluid extract of infected *Aquilaria sinensis* (Chinese agarwood)

Marko Z. Mladenović <sup>1</sup>, Ou Huang <sup>2</sup>, Bo Wang <sup>3</sup>, Alexandre Ginestet <sup>4</sup>, Didier Desbiaux <sup>4</sup>, and Nicolas Baldovini <sup>5,\*</sup>

<sup>1</sup> Faculty of Sciences and Mathematics, University of Niš, Višegradska 33, 18000 Niš, Serbia; [markohem87@gmail.com](mailto:markohem87@gmail.com)

<sup>2</sup> Guangdong Shangzhengtang Group Co. Ltd, 6 Qian Wu street, Dongcheng road, 523129 Dongguan, China; [sztchina@163.com](mailto:sztchina@163.com)

<sup>3</sup> School of Life and Health Technology, Dongguan University of Technology, 523808 Dongguan, China; [bwang@dgut.edu.cn](mailto:bwang@dgut.edu.cn)

<sup>4</sup> MAG Industry Holdings Ltd., 26 Queensland, Nancheng Century City, 523617 Dongguan, China; [didier.desbiaux@gmail.com](mailto:didier.desbiaux@gmail.com) (D.D.); [alexandre@mag-vision.fr](mailto:alexandre@mag-vision.fr) (A.G.)

<sup>5</sup> Institut de Chimie de Nice. UMR 7272. Université Côte d'Azur. Parc Valrose 06108 Nice. France; [Nicolas.BALDOVINI@univ-cotedazur.fr](mailto:Nicolas.BALDOVINI@univ-cotedazur.fr)

\* Correspondence: [Nicolas.BALDOVINI@univ-cotedazur.fr](mailto:Nicolas.BALDOVINI@univ-cotedazur.fr); Tel.: +334 92076133

### Content:

**Figure S1.** <sup>1</sup>H NMR spectrum of (2) recorded in CDCl<sub>3</sub>

**Figure S2.** <sup>13</sup>C NMR spectrum of (2) recorded in CDCl<sub>3</sub>

**Figure S3.** <sup>1</sup>H NMR spectrum of (3) recorded in CDCl<sub>3</sub>

**Figure S4.** <sup>13</sup>C NMR spectrum of (3) recorded in CDCl<sub>3</sub>

**Figure S5.** <sup>1</sup>H NMR spectrum of (4) recorded in CDCl<sub>3</sub>

**Figure S6.** <sup>13</sup>C NMR spectrum of (4) recorded in CDCl<sub>3</sub>

**Figure S7.** <sup>1</sup>H NMR spectrum of (6) recorded in CDCl<sub>3</sub>

**Figure S8.** <sup>13</sup>C NMR spectrum of (6) recorded in CDCl<sub>3</sub>

**Figure S9.** <sup>1</sup>H NMR spectrum of (8) recorded in CDCl<sub>3</sub>

**Figure S10.** <sup>13</sup>C NMR spectrum of (8) recorded in CDCl<sub>3</sub>

**Figure S11.** <sup>1</sup>H NMR spectrum of (10) recorded in CDCl<sub>3</sub>

**Figure S12.** <sup>13</sup>C NMR spectrum of (10) recorded in CDCl<sub>3</sub>

**Figure S13.** <sup>1</sup>H NMR spectrum of (11) recorded in CDCl<sub>3</sub>

**Figure S14.** <sup>13</sup>C NMR spectrum of (11) recorded in CDCl<sub>3</sub>

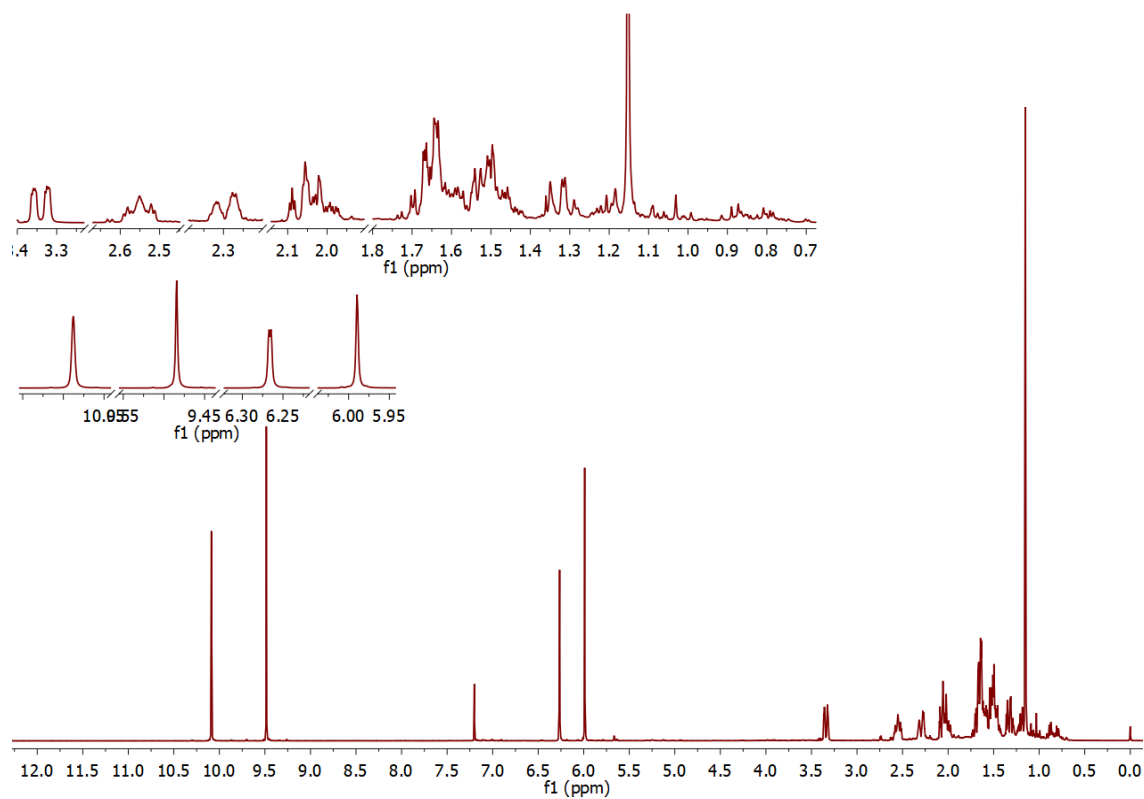

**Figure S1.**  $^1\text{H}$  NMR spectrum of (2) recorded in  $\text{CDCl}_3$

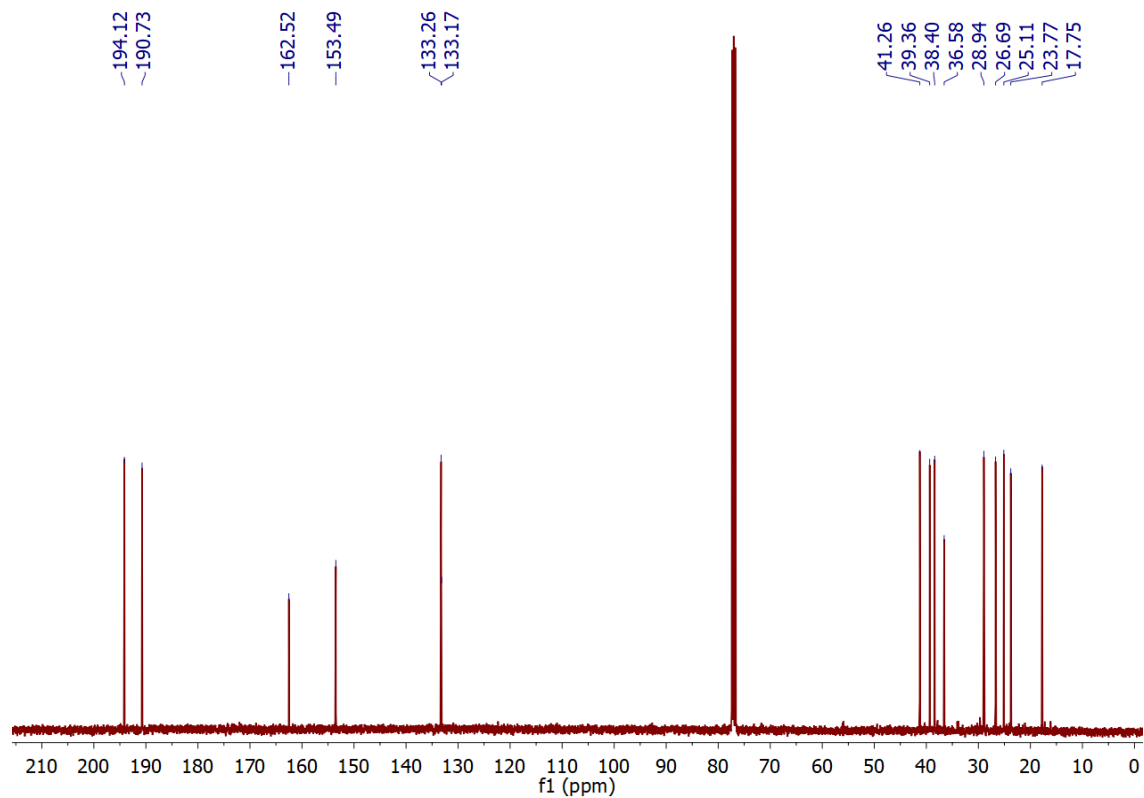

**Figure S2.**  $^{13}\text{C}$  NMR spectrum of (2) recorded in  $\text{CDCl}_3$

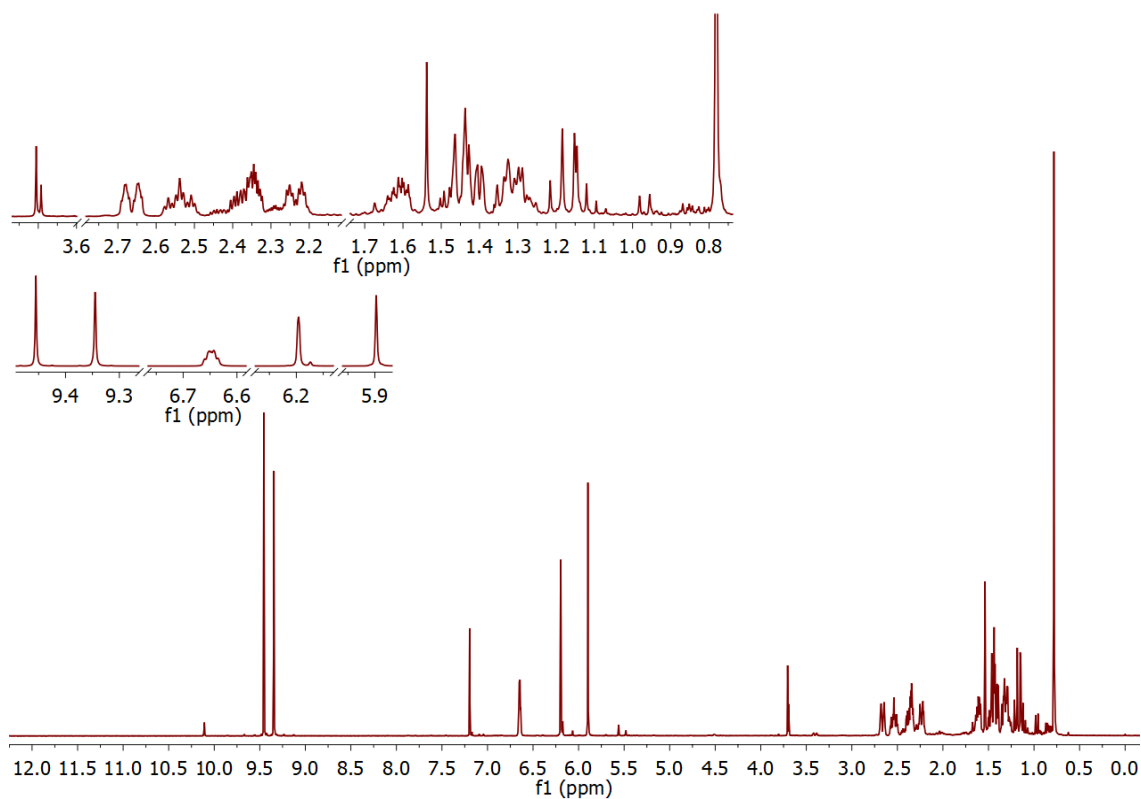

**Figure S3.** <sup>1</sup>H NMR spectrum of (3) recorded in CDCl<sub>3</sub>

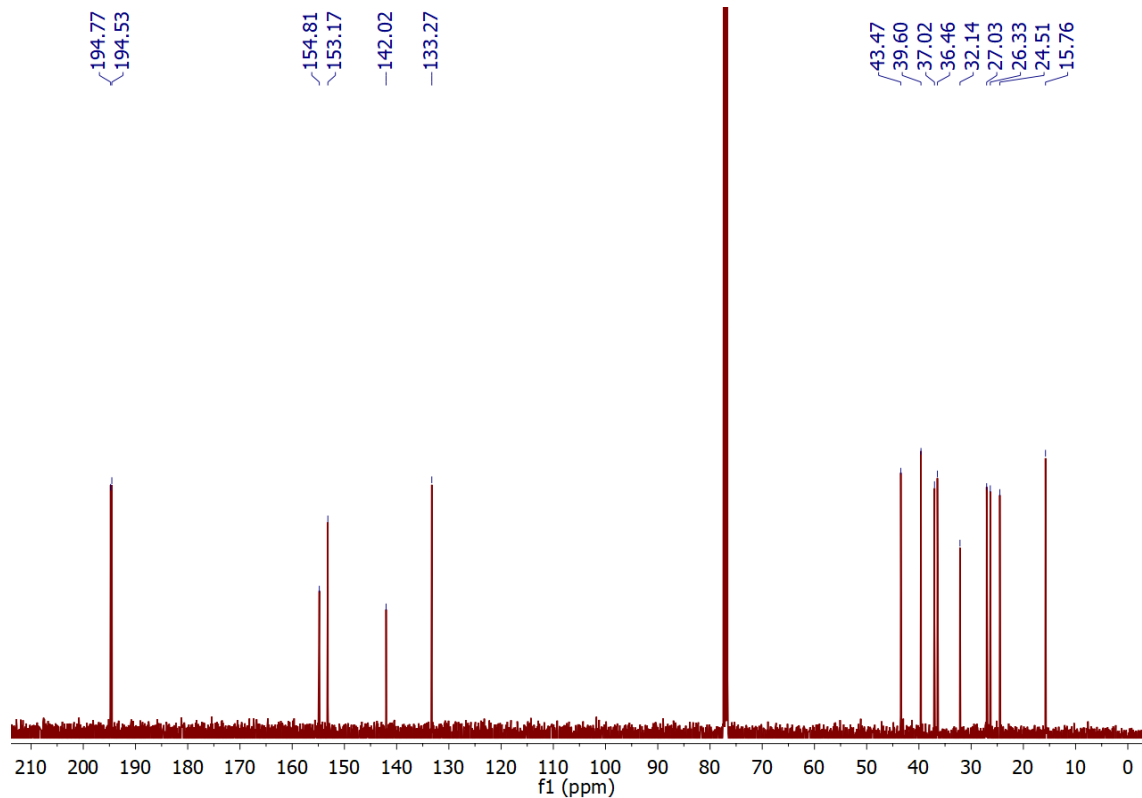

**Figure S4.** <sup>13</sup>C NMR spectrum of (3) recorded in CDCl<sub>3</sub>

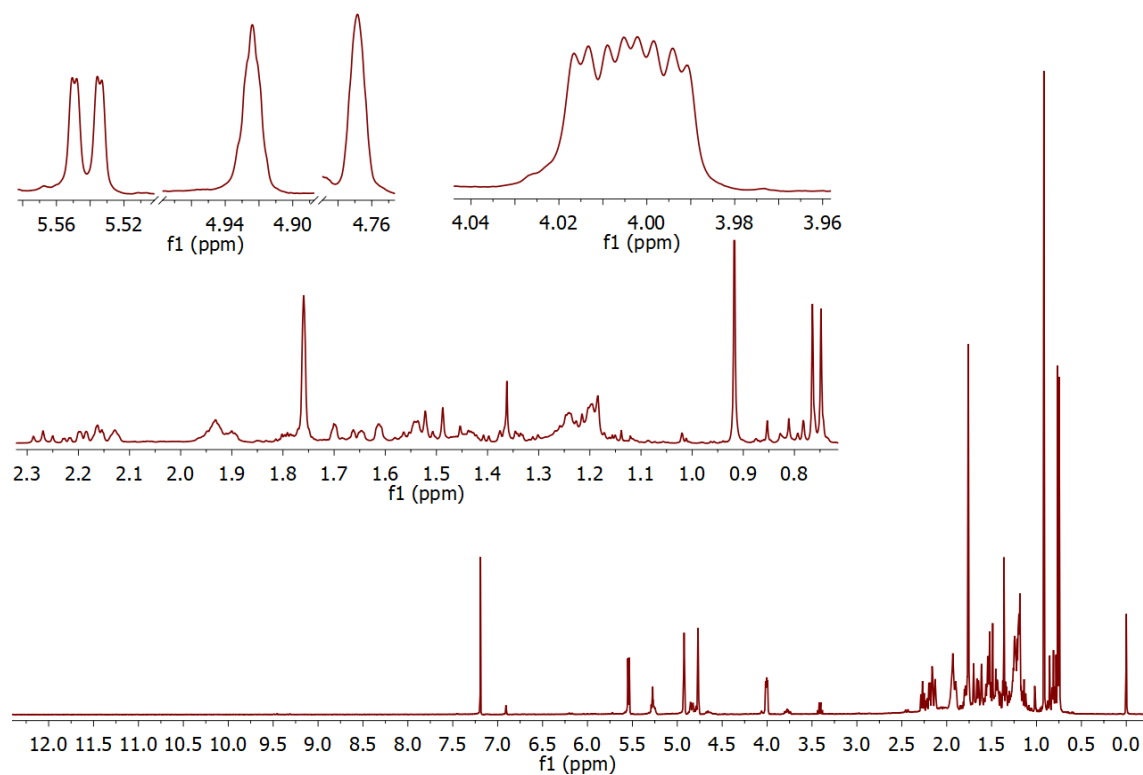

Figure S5.  $^1\text{H}$  NMR spectrum of (4) recorded in  $\text{CDCl}_3$

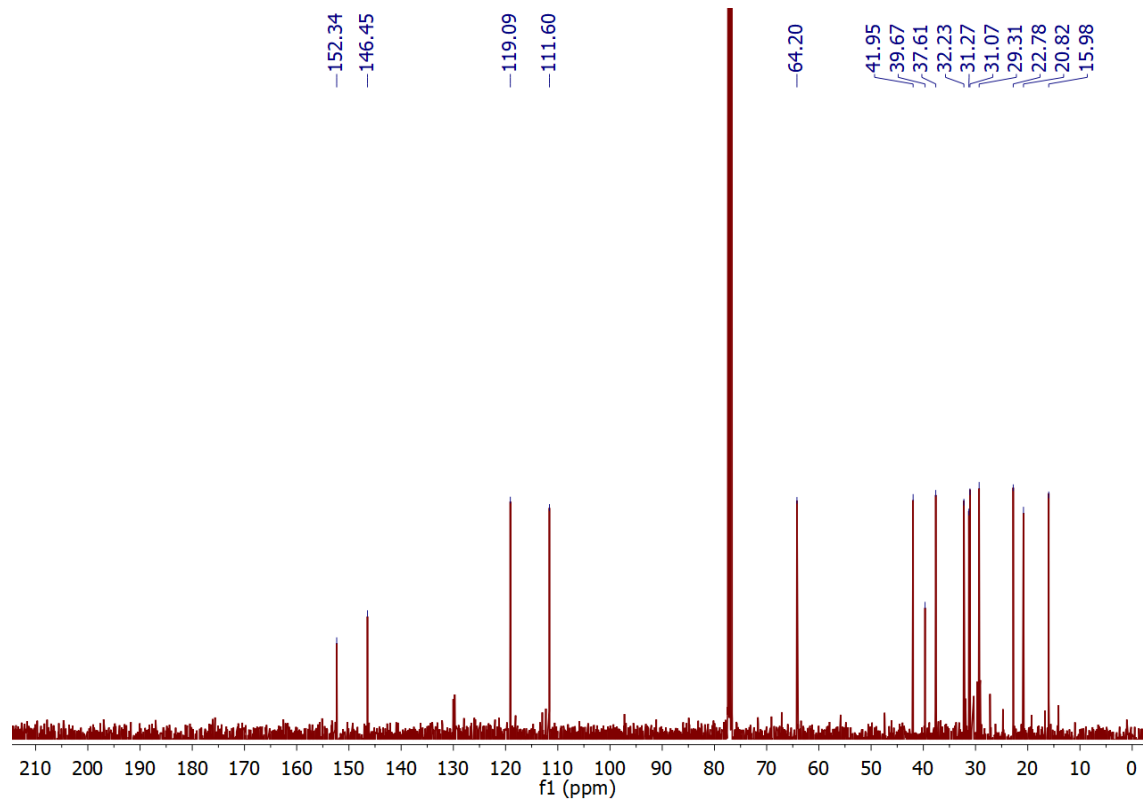

Figure S6.  $^{13}\text{C}$  NMR spectrum of (4) recorded in  $\text{CDCl}_3$

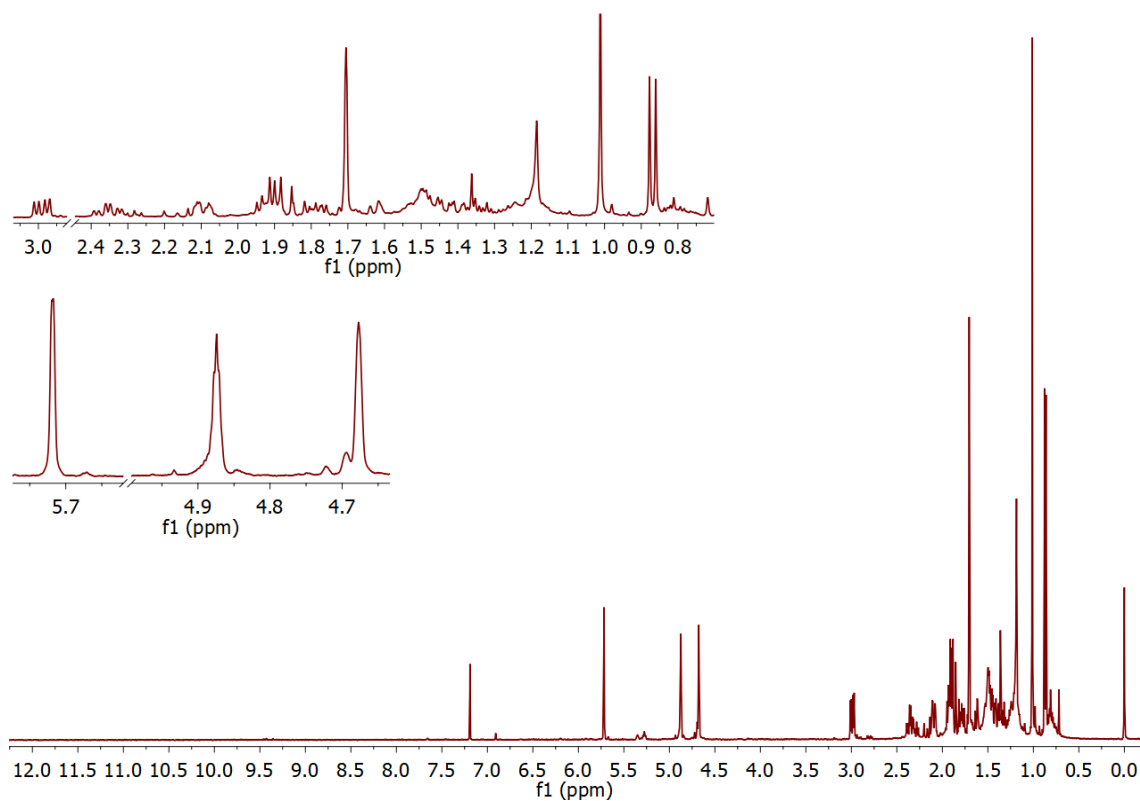

**Figure S7.**  $^1\text{H}$  NMR spectrum of (6) recorded in  $\text{CDCl}_3$

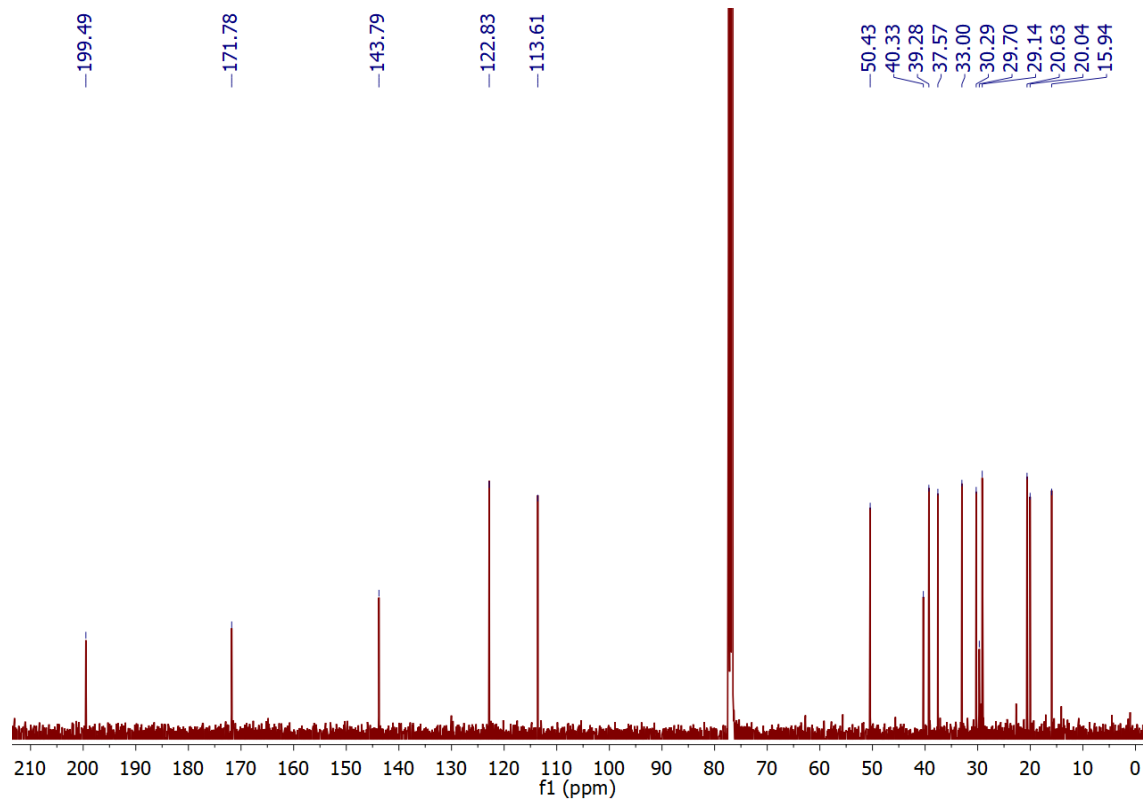

**Figure S8.**  $^{13}\text{C}$  NMR spectrum of (6) recorded in  $\text{CDCl}_3$

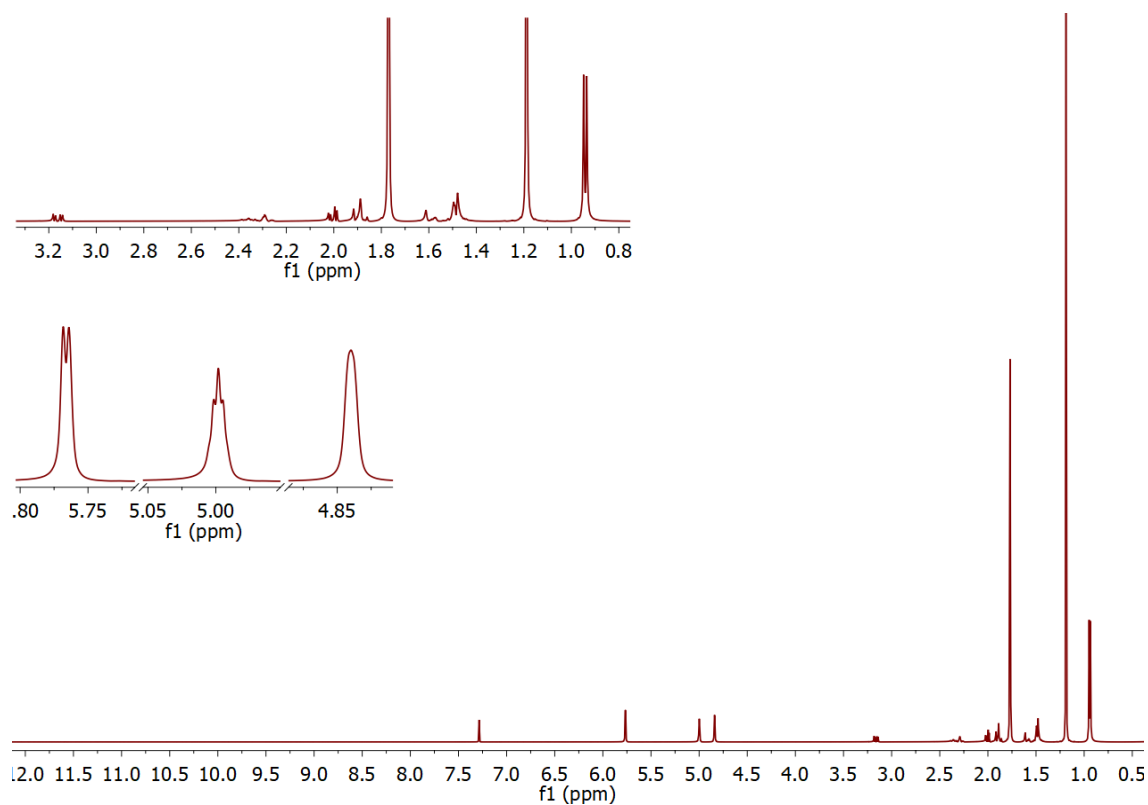

**Figure S9.**  $^1\text{H}$  NMR spectrum of (8) recorded in  $\text{CDCl}_3$

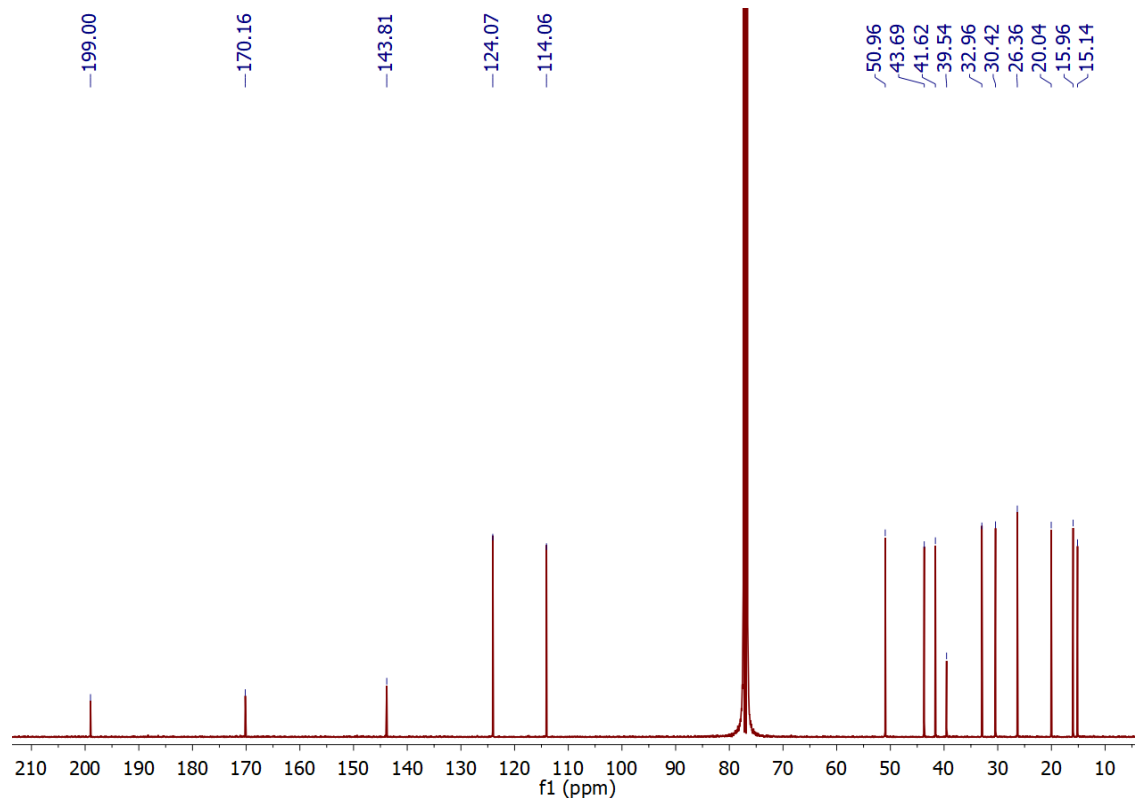

**Figure S10.**  $^{13}\text{C}$  NMR spectrum of (8) recorded in  $\text{CDCl}_3$

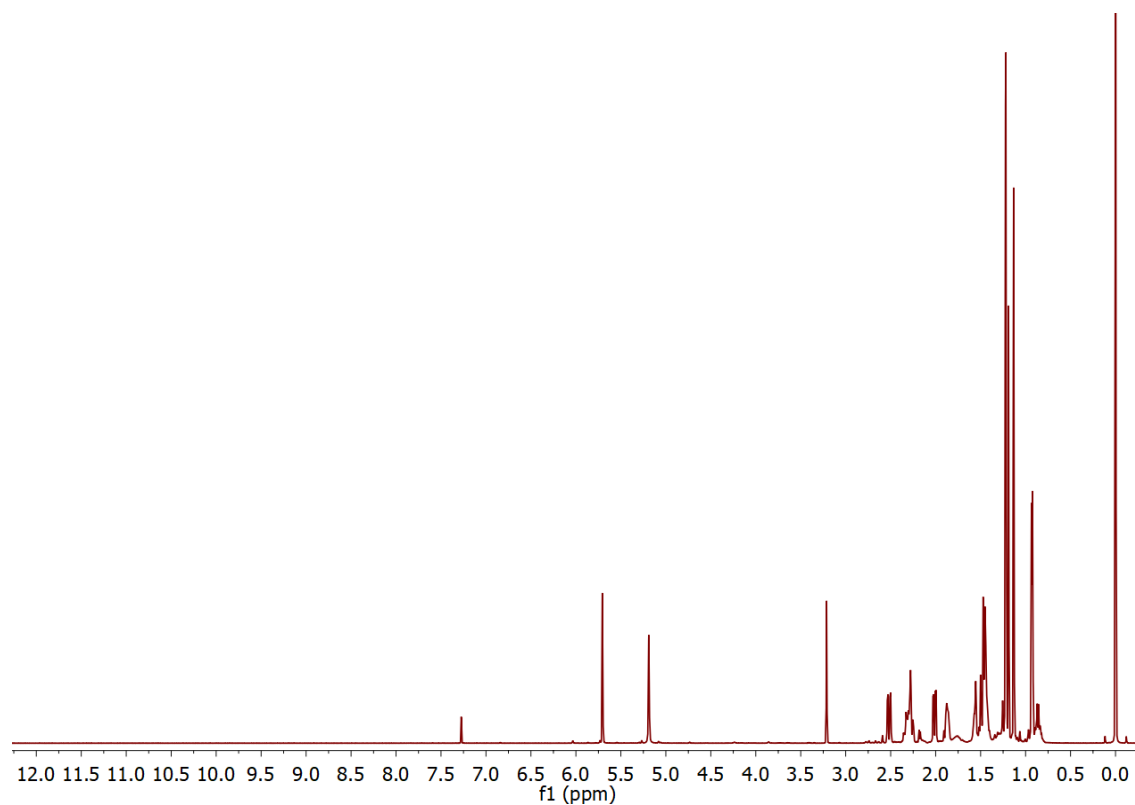

**Figure S11.** <sup>1</sup>H NMR spectrum of (10) recorded in CDCl<sub>3</sub>

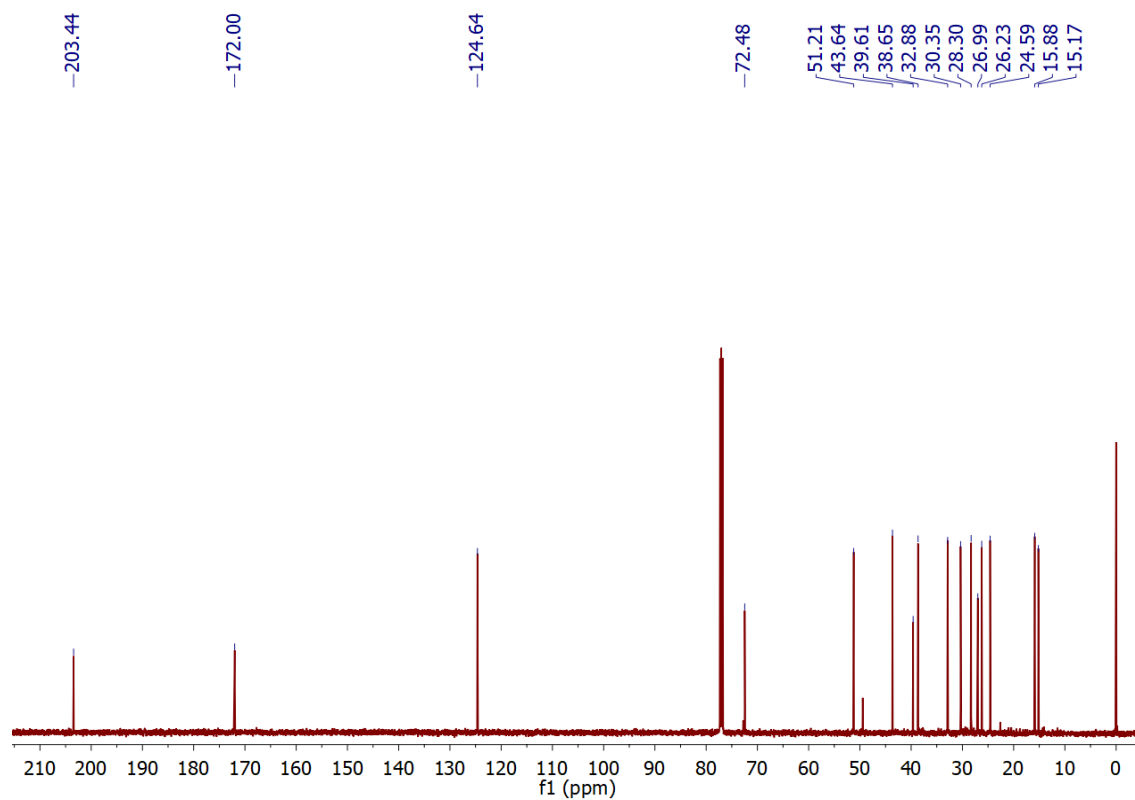

**Figure S12.** <sup>13</sup>C NMR spectrum of (10) recorded in CDCl<sub>3</sub>

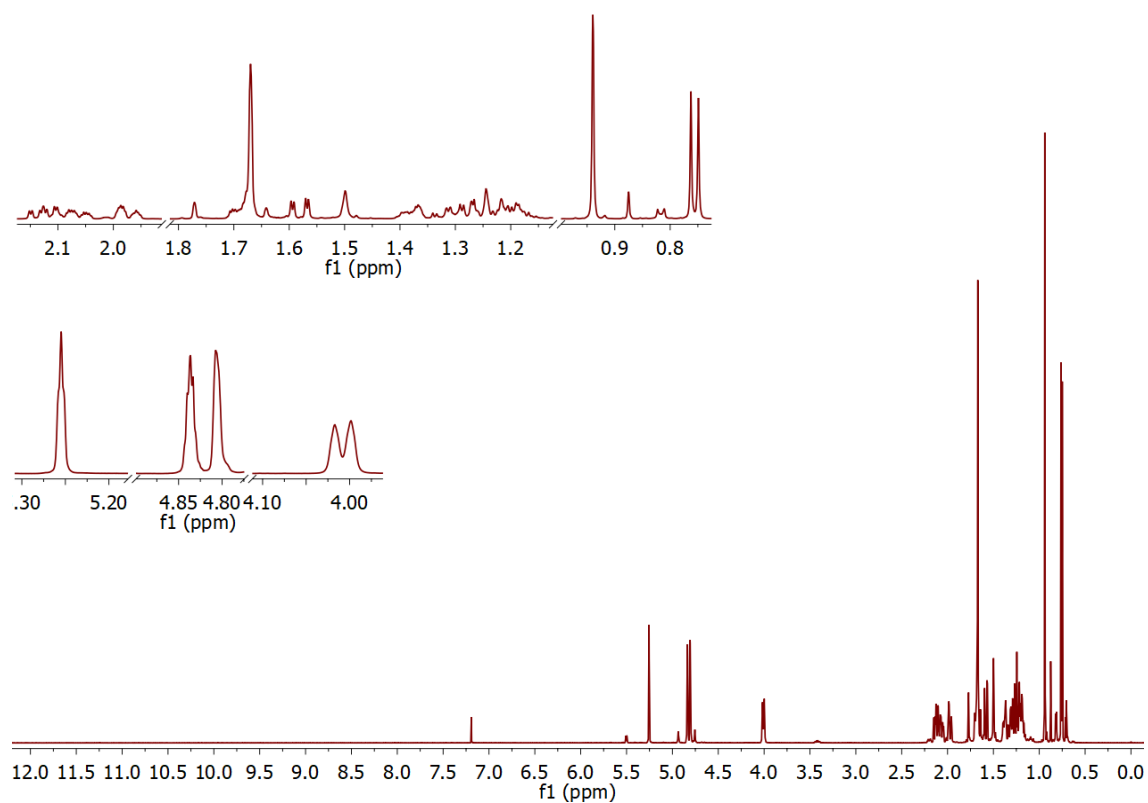

**Figure S13.**  $^1\text{H}$  NMR spectrum of (11) recorded in  $\text{CDCl}_3$

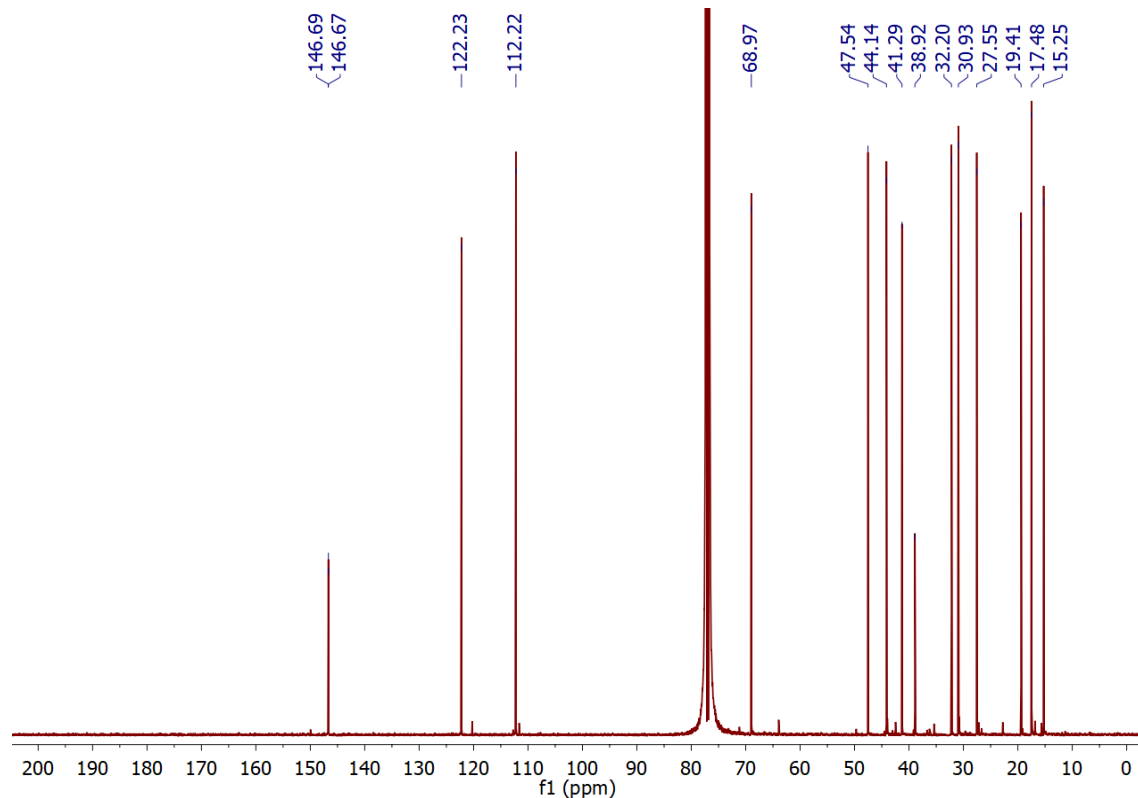

**Figure S14.**  $^{13}\text{C}$  NMR spectrum of (11) recorded in  $\text{CDCl}_3$
